# Supplementary material
Source: PubMed Central journal article supplement (PMC3771345)

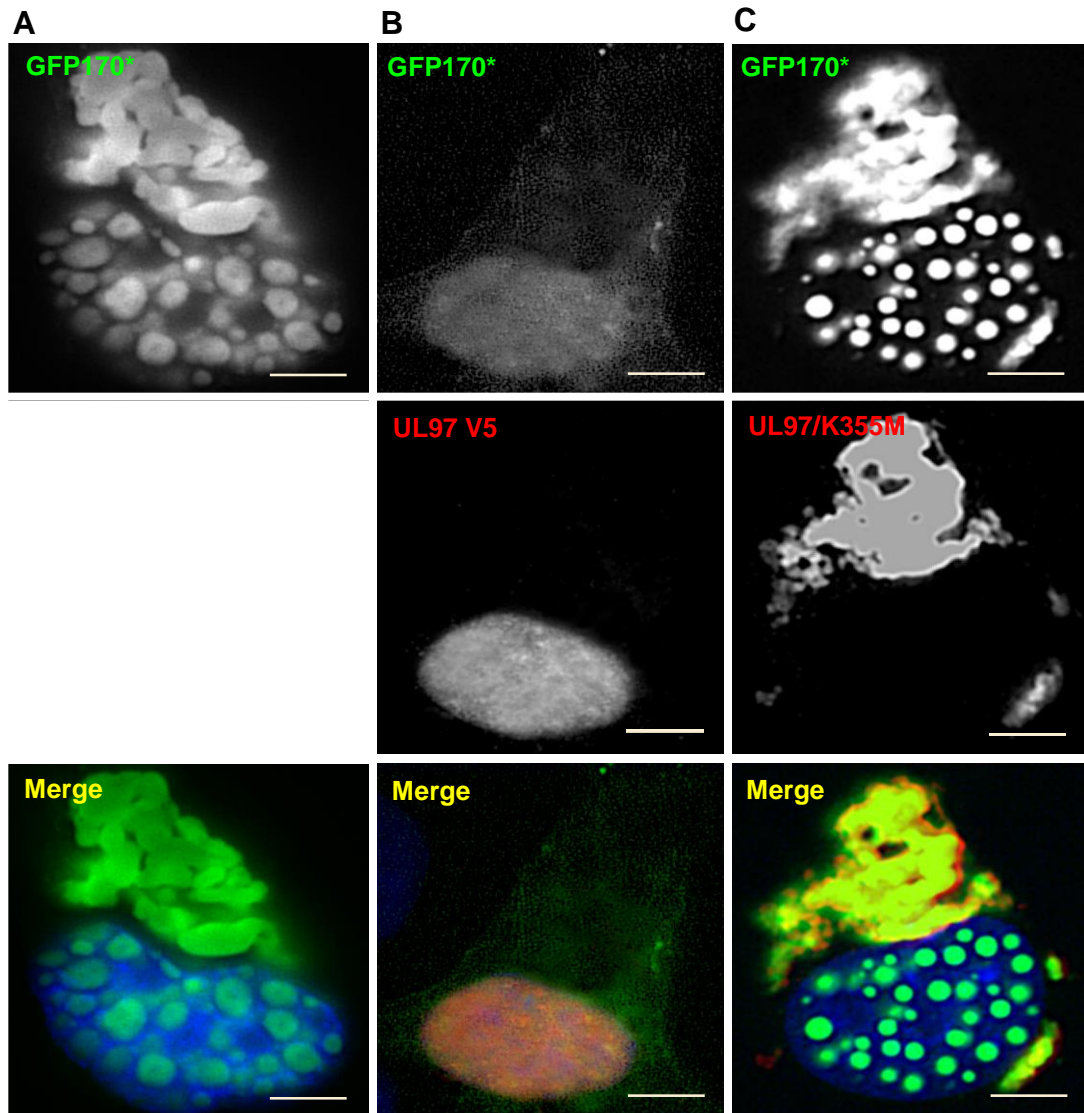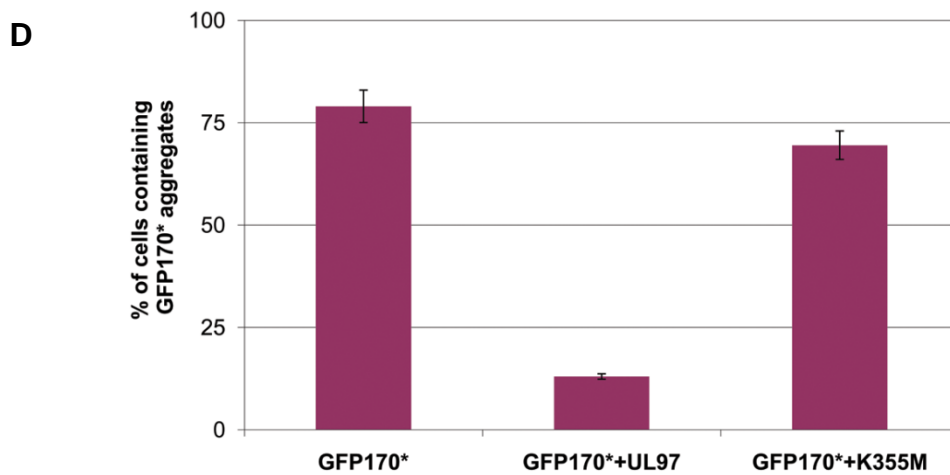

Supplement: NIHMS507568-supplement-Supplementary_Data_1.pdf [file NIHMS507568-supplement-Supplementary_Data_1.pdf]

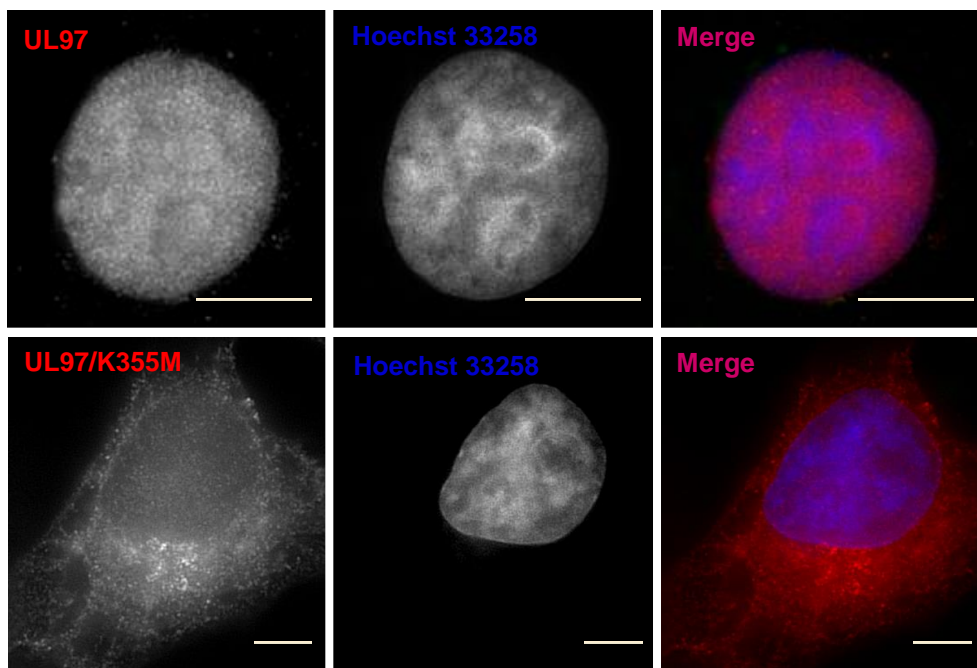

Supplement: NIHMS507568-supplement-Supplementary_Data_2.pdf [file NIHMS507568-supplement-Supplementary_Data_2.pdf]
